# Supplementary material for: Regulating the compactness of Cu nanoclusters with assembly-induced emission properties for highly sensitive optical strain sensing
Source: Royal Society of Chemistry journal article supplement (doi:10.1039/d5tc03800f), 2026-01-01
Supplement: d5tc03800f1.pdf [file d5tc03800f1.pdf]

## Supporting Information

### Regulating the compactness of Cu nanoclusters with assembly-induced emission properties for highly sensitive optical strain sensing

Xinbin Wang,<sup>†a</sup> Shan Chen,<sup>†a</sup> Yun Cai,<sup>\*b</sup> Furong Wang,<sup>a</sup> Qinsong Zhang,<sup>a</sup> Farouk

Meksen,<sup>a</sup> Jun Fang<sup>a</sup> and Yang Yang<sup>\*a</sup>

<sup>a</sup> State Key Laboratory of Materials-Oriented Chemical Engineering, College of Chemical Engineering, Nanjing Tech University, Nanjing 211816, P. R. China.

\* Email: [yangy@njtech.edu.cn](mailto:yangy@njtech.edu.cn)

<sup>b</sup> Quzhou Membrane Material Innovation Institute, Nanjing Tech University, Quzhou 324000, P. R. China

\* Email: [caiyun9126@163.com](mailto:caiyun9126@163.com)

<sup>†</sup> Xinbin Wang and Shan Chen made equal contribution to this work.

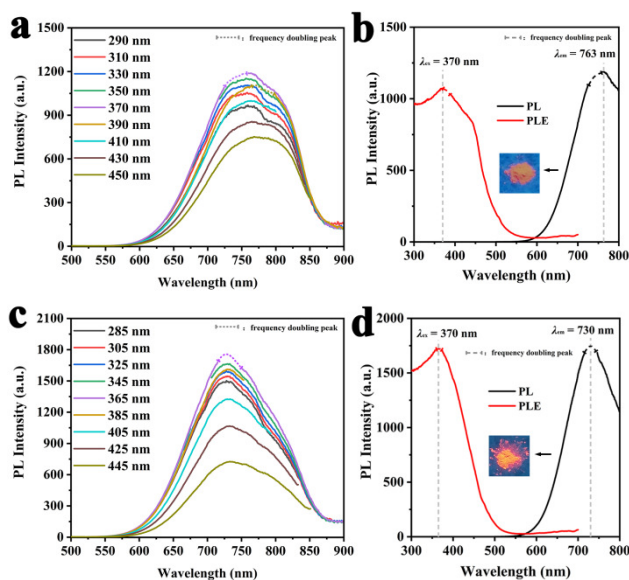

**Fig. S1** PL spectra of (a) CuNCs-MP and (c) CuNCs-DMMP powder under different excitation wavelengths. Photoemission (black line) and photoexcitation (red line) spectra of (b) CuNCs-MP and (d) CuNCs-DMMP powder.

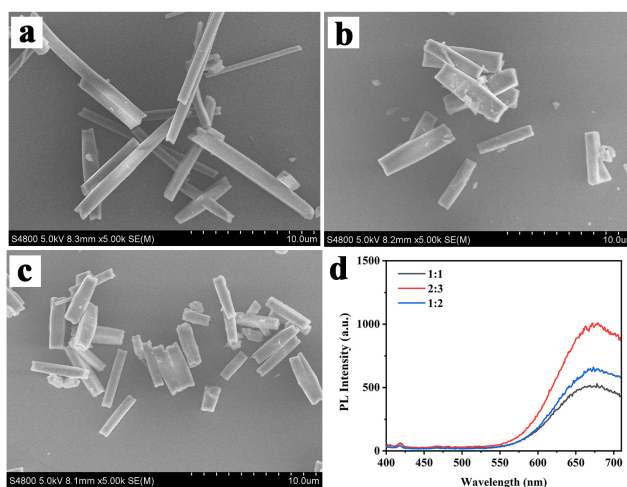

**Fig. S2** SEM images of MMP-capped CuNCs assemblies with different Cu/MMP ratios: (a) 1:1, (b) 2:3, and (c) 1:2. (d) PL spectra of MMP-capped CuNCs assemblies with different Cu/MMP ratios.

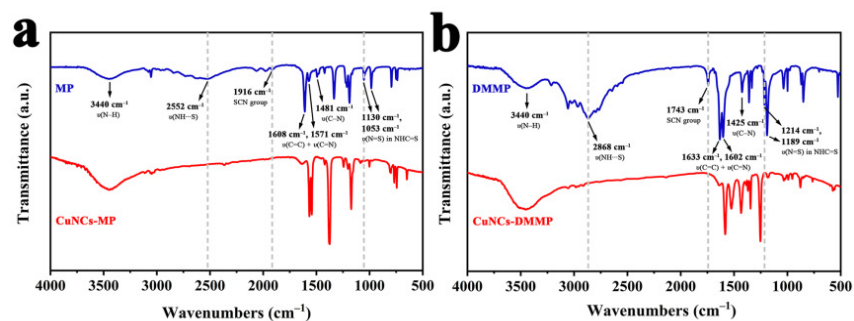

**Fig. S3** FTIR spectra of (a) CuNCs-MP and (b) CuNCs-DMMP.

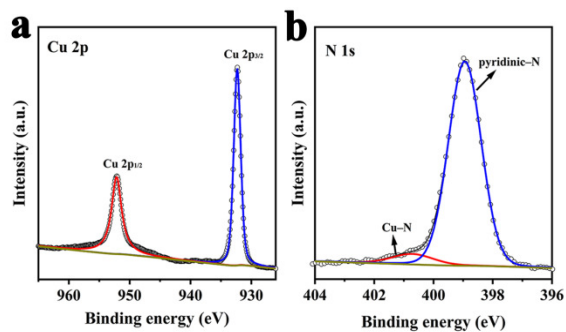

**Fig. S4** XPS spectra of (a) Cu 2p and (b) N 1s of CuNCs-MMP.

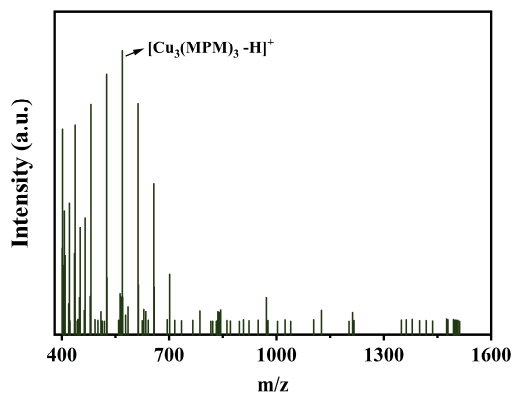

**Fig. S5** ESI-MS spectrum of CuNCs-MMP.

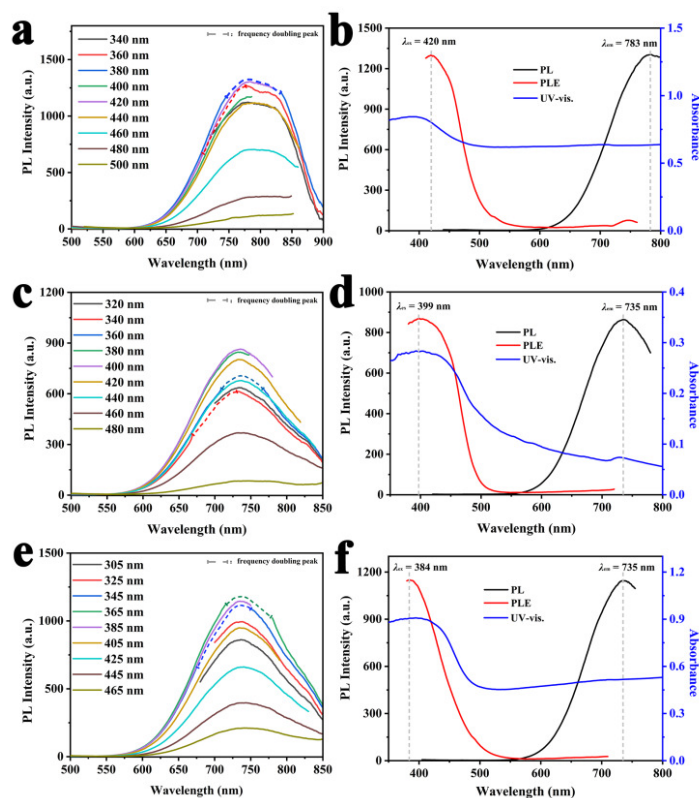

**Fig. S6** PL spectra of (a) CuNCs-MP/PDMS, (c) CuNCs-MMP/PDMS and (e) CuNCs-DMMP/PDMS composite elastomers under different excitation wavelengths. Photoemission (black line), photoexcitation (red line) and UV-vis diffuse reflectance spectra (blue line) of (b) CuNCs-MP/PDMS, (d) CuNCs-MMP/PDMS and (f) CuNCs-DMMP/PDMS composite elastomers.

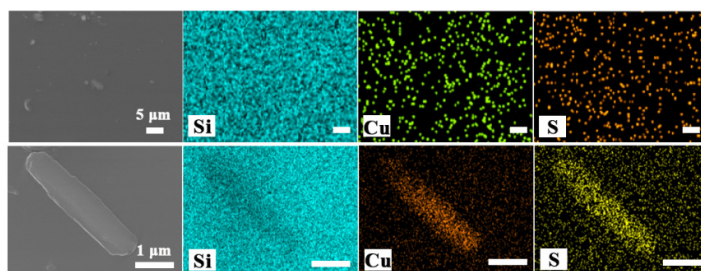

**Fig. S7** SEM images with different magnifications and corresponding EDS mappings of surface of CuNCs-MMP/PDMS.

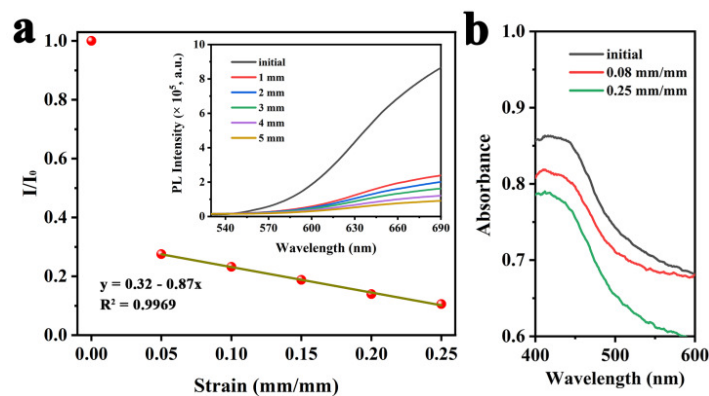

**Fig. S8** (a) Plot of relative fluorescence intensity  $I/I_0$  of CuNCs-MMP/PDMS composite elastomer as function of high strain, where  $I_0$  is PL intensity at 690 nm of the sample at initial state; inset is collection of PL spectra obtained during high-strain tensile testing. (b) UV-vis diffuse reflectance spectra of CuNCs-MMP/PDMS at different strains.

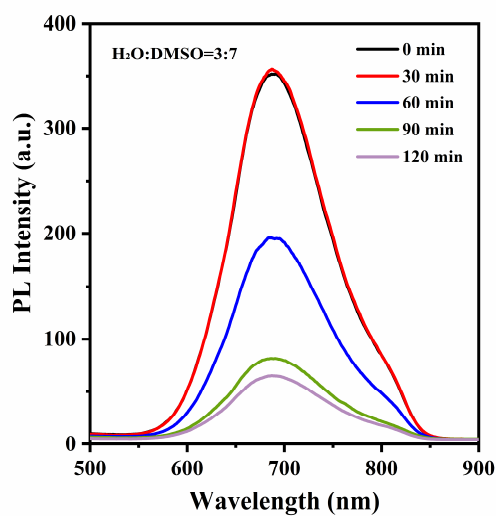

**Fig. S9** Collection of PL spectra of CuNCs-MMP obtained in  $H_2O/DMSO$  mixture ( $H_2O:DMSO = 3:7$ ) recorded at intervals of 30 min.
